# Supplementary material for: Meta-Analysis of Preclinical Studies of Fibrinolytic Therapy for Acute Lung Injury
Source: Front Immunol. 2018 Aug 20;9:1898. doi: 10.3389/fimmu.2018.01898 (PMC6110197; doi:10.3389/fimmu.2018.01898)
Supplement: Supplementary file 2 [file Data_Sheet_2.xlsx]

## Sheet: Sheet1
Note: green:name of selected parameters for statistics; red: data selected for statistics
Blood-index
Paper	group	PaO2	baseline	0h/IAC(immediately after induction)	0h/IAK(immediately after treatment)	10min	20min	30min	40min	60min/1h	80min	2h	3h	4h	5h	6h	7h	8h	11h	12h	13.5h	17.5h	18h	21.5h	23h	24h	30h	48h/2d	4d	14d
Günther A 2003	control	53.5±24 (9)
	uPA＋early (28days measure)	53.4±8.94 (5)
	uPA＋late (28days measure)	60.5±17.73 (7)
Hardaway RM1990	control		222±97.68																									39±17.16
	uPA		213.02±97.99																									84.52±38.88
	tPA		150.12±68.3																									187.15±86.09
Veress LA 2013	control																			42.60±7.27（4）
	tPA0.15mg/Kg (12h measure)																			83.12±33.06（2）
	tPA0.3mg/Kg																			72.21±10.39（4）
	tPA0.5mg/Kg																			78.44±5.19（4）
	tPA0.7mg/Kg																			65.97±7.27（4）
Conhaim RL 2014	control																										105.8±10.2（6）
	tPA																										102.5±3.5（6）
Hardaway RM 1996	control		311.23±37.26（8）	298.08±93.15（8）						218.08±109.59（8）					131.51±62.47（8）											43.84±24.11（1）
	UPA		288.22±110.69（8）	281.64±103.01（8）						237.81±110.69（8）					172.06±104.11（8）											93.15±116.2（8）
Vasquez Y-1998	control 1		376.56±98.74	425.36±45.93/425.36±121.52*	393.78±45.93/393.78±121.52*							359.33±48.8/359.33±129.11*		273.21±45.93/273.21±121.52*			40.67±5.93/40.67±15.69*		43.54±45.93/43.54±121.52*		83.73±45.94/83.73±121.55*	75.12±48.8/75.12±129.11*		52.15±48.8/52.15±129.11*	63.64±43.06/63.64±113.93*
	uPA1h		359.33±106.33	359.33±40.19/359.33±106.33*	290.43±40.19/290.43±106.33*							281.82±37.32/281.82±98.74*		253.11±43.06/253.11±113.93*			138.28±40.19/138.28±106.33*		57.89±34.45/57.89±91.15*		57.89±43.06/57.89±113.93*	55.02±40.19/55.02±106.33*		52.15±40.19/52.15±106.33*	49.28±40.19/52.15±106.33*
	control 2		330.95±104.99	350±42.86/350±104.99*	323.81±45.24/323.81±110.81*					304.76±42.86/304.76±99.13*			180.95±45.24/180.95±110.81*			23.81±40.48/23.81±99.16*
	uPA 2h		316.67±99.13	319.05±40.48/319.05±99.16*	233.33±40.47/233.33±99.13*					211.91±42.86/211.91±99.13*			154.76±40.49/154.76±99.18*			35.71±38.09/35.71±93.30*
Münster AM 2002	control				90.56±1.94											77.25±5.20				77.63±4.34			78.19±4.53			76.88±4.78
	uPA				89.25±5.19											82.69±3.67				88.69±1.04			79.13±3.04			80.63±2.16
Huang LT 2012	control			85±14						107±9		109±9
	tPA			80±10						103±5		95±12
Motoyama H 2013	control		158.38±5.74（7）			157.35±11.47		159.64±9.36		160.32±9.06
	no-plasmin		148.79±7.25（7）			146.51±5.44		144.34±6.95		142.74±4.83
	plasmin		147.42±6.65（7）			153.93±6.34		151.53±12.08		151.19±10.87
Motoyama H 2014	(control）				66.43±11.32		63.21±14.18		60.54±14.15	55.71±12.78	50.4±8.68
	plasmin				102.32±11.35		102.32±9.92		98.04±7.06	93.21±8.52	87.8±8.89
Yu HZ 2014	control		70±10	60±14																								61±10	62±10	63±8
	uPA		69±9	59±9																								75±11	73±15	64±8
Chen XF 2009	control				94.2±5.7					61.7±4.9		70.5±3.7		81.7±4.5				92.0±5.8
	uPA				94.2±2.3					67.4±3.8		78.2±4.7		85.3±5.4				92.3±4.5
		PaCO2	base	IAC	0h	1h	2h	4h	6h	8h	12h	18h	24h	2d	4d	14d
Münster AM 2002	control				37.69±3.23				36.94±1.96		35.06±2.39	36±2.17	35.63±2.16
	uPA				36±1.32				36.56±1.95		36.38±1.32	37.88±2.62	42.56±3.25
Huang LT 2012	control				42±9（7）	22±3（7）	21±2（7）
	tPA				44±5（7）	23±2（7）	21±6（7）
Veress LA 2013	control										54.26±11.57（4）
	tPA0.15mg/Kg (12h measure)										29.19±2.73（2）
	tPA0.3mg/Kg										31.40±2.75（4）
	tPA0.5mg/Kg										28.37±2.75（4）
	tPA0.7mg/Kg										32.5±1.65（4）
Veress LA 2015	control	117.4±28.12（13）
	tPA	51.3±9.3（9）
Conhaim RL 2014	control											38.0±1.3（6）
												41.7±4.1（6）
Yu HZ 2014	control		42±5	38±6										38±5	37±7	38±6
	uPA		41±7	37±8										41±6	37±6	44±2
Chen XF 2009	control				37.2±2.4	25.2±3.2	27.3±2.3	29.3±3.4		30.1±3.2
	uPA				36.4±5.4	27.1±2.5	26.3±2.3	28.1±4.2		30.2±5.2
		PH	baseline	0h	1h	2h	3h	4h	5h	6h	7h	11h	12h	13.5h	18h	17.5h	21.5h	23h	24h
Huang LT 2012	control			7.43±0.02	7.65±0.07	7.61±0.02
	tPA			7.44±0.04	7.71±0.03	7.65±0.10
Veress LA 2013	control	7.29±0.065（4）
	tPA0.15mg/Kg	7.45±0.006（2）
	tPA0.3mg/Kg	7.43±0.049（4）
	tPA0.5mg/Kg	7.48±0.02（4）
	tPA0.7mg/Kg	7.43±0.04（4）
Veress LA 2015	control	7.05±0.11（13）
	tPA	7.39±0.03（9）
Conhaim RL 2014	control														7.45± 0.01（6）
	tPA														7.46±0.05（6）
Münster AM 2002	control			7.56±0.21						7.55±0.20			7.57±0.21		7.54±0.21				7.53±0.21
	uPA			7.56±0.20						7.56±0.20			7.57±0.20		7.55±0.21				7.50±0.21
Vasquez Y 1998	control 1		7.48±0.08	7.43±0.03		7.34±0.05		7.31±0.03			7.36±0.05	7.39±0.05		7.56±0.08		7.46±0.05	7.50±0.03	7.52±0.05
	uPA 1h		7.49±0.03	7.40±0.05		7.36±0.08		7.34±0.05			7.39±0.08	7.49±0.05		7.51±0.05		7.55±0.05	7.52±0.08	7.52±0.05
	control 2		7.45±0.10	7.34±0.10	7.32±0.10		7.29±0.10			7.20±0.12
	uPA 2h		7.48±0.12	7.31±0.12	7.26±0.15		7.23±0.15			7.17±0.12
Hardaway RM 1996	control		7.53±0.04	7.49±0.045	7.41±0.058				7.33±0.11（8）
	UPA		7.56±0.034	7.55±0.04	7.50±0.056				7.45±0.078（8）
		clotting time（s）	baseline	0h	1h	5h	20h	24h	44h
Enkhbaatar P 2004	control		152±36.74				175±41.64		170±56.34
	tPA2mg		161±9.80				167±48.99		164±19.60
Hardaway RM1990	control	549.6
	uPA	442.2
	tPA	373.2
Hardaway RM1996	control		276（8）	408	306	384		大于3648（1）
	UPA		312（8）	462	342	438		1164（8）
Conhaim RL 2014	control	486±168（6）
	tPA	234±48（6）
		Platelets（103/ul）	base	IAC	0h/IAK	1h	2h	3h	4h	6h	7h	8h	12h	18h	24h	30h	36h	42h	48h
Hardaway RM 1990	control				371							235	281	265	225	184	142	154	103
	uPA				531							374	336	390	360	300	295	214	257
	tPA				662							590	533	479	468	462	369	397	416
Vasquez Y 1998	control 1		324±31.7	327±50.3	293±31.7		212±52.9		205±60.9		286±169.3
	uPA1h		306±103.2	342±66.1	284±39.7		201±60.9		178±42.3		194±21.4
	control 2		416±53.9	364±61.2	291±51.4	234±56.3		217±73.5		211±80.8
	uPA2h		305±151.9	279±129.8	181±80.8	153±66.1		172±83.3		169±95.5
Gunther A 2003	control	402± 66
	UPA＋early (28days measure)	430±114.04
	UPA＋late (28days measure)	363±92.60
	Fibrinogen（mg/dl)	base	IAC	0h	1h	2h	3h	4h	5h	6h	7h	10h	20h	30h	40h	48h
Hardaway RM1990	control			196								213.68	240.54	275.83	319.57	225.96
	uPA			228								213.68	272.76	235.17	258.18	298.08
	tPA			184								194.5	286.57	408.57	424.68	414.71
Hardaway RM 1996	control	204.5±31.5		205.3±34.7	184.1±34.7				160.8±53.5
	uPA	218.1±31.5		212.6±33.6	208.2±38.8				261.5±94.5
Vasquez Y 1998	control 1		126±47.6	148±50.3		127±58.2123		123±76.7			169±92.6
	uPA1h		180±113.8	164±84.7		123±95.2		74±42.3			120±63.5
	control 2		129±10.8	106±24.5	87±41.6		69±44.1			102±49
	uPA2h		174±26.9	116±36.7	113±18.9		93±24.2			97±16.4
		Plasma TATc（ng/ml）
Choi G 2007	control 1	34.56±3.01(11)
	tPA 4h	33.92±3.66(8)
	control 1	19.5±3.14(12)
	tPA 16h	20.06±5.13(8)
Choi G 2007*	control 1	16.9±1.17（8)
	tPA 6h	18.76±1.46（8)
	control 2	14.2±0.87（8)
	tPA 16h	15.26±1.75（8)
Hofstra JJ 2013	control 1	15±3.05（7)
	tPA- P. aeruginosa	19.23±2.02（7）
	control 2	21.75±3.71（7）
	tPA-LPS	25.82±3.13（7）
		Plasma PAA
Choi G 2007	control 1	78.95±5.80
	tPA 4h	119.74±1.22
	control 2	63.16±4.54
	tPA 16h	119.74±1.22
Choi G 2007*	control 1	82.64±6.45（8)
	tPA 6h	110.58±0.5
	control 2	92.33±3.22（8)
	tPA 16h	110.38±0.5
Hofstra JJ 2013	control 1	73.34±8.67（7）
	tPA- P. aeruginosa	119.07±0.5（7）
	control 2	75.61±3.62（7）
	tPA-LPS	119.87±0.5（7）
	BALF index
	paper	Neutrophils（106/ml）
Choi G 2007	control 2	0.064±0.058
	tPA 16h	0.059±0.03
Choi G 2007*	control 1	2.27±0.37
	tPA 6h	2.01±0.18
	control 2	1.85±0.27
	tPA 16h	1.68±0.30
Stringer KA 1998	control	2.9±1.13
	tPA	2.7±1.26
Hofstra JJ 2013	control 1	1.97±0.16
	tPA- P. aeruginosa	1.78±0.23
	control 2	0.36±0.08
	tPA-LPS	0.27±0.05
Günther A 2003	control	0.1±0.03
	uPA＋early (28days measure)	0.06±0.01
	uPA＋late (28days measure)	0.07±0.008
		Leucocytes(103/ul)	base	0h	1h	5h	24h
Hardaway RM1996	control		18.31±5.45(103)	10.09±4.46	5.83±2.60	8.27±4.09	36±5.95
	UPA		17.92±5.08	11.69±4.21	4.7±0.99	14.08±11.65	14.79±7.69
Günther A2003	control	6.9±2.4
	uPA early	6.5±2.0
	uPA late	6.4±1.59
		BAL Total Cells（106/ml）
Choi G 2007	control	0.398±0.08
	tPA 16h	0.23±0.03
Choi G 2007*	control 1	2.47±0.4
	tPA 6h	2.19±0.52
	control 2	2.18±0.69
	tPA 16h	1.96±0.8
Günther A 2003	control	145.6±227.1(9)
	uPA＋early (28days measure)	146±116.28(5)
	uPA＋late (28days measure)	119±89.69(7)
Hofstra JJ 2013	control	2.03±0.16
	tPA- P. aeruginosa	2.30±0.29
	(control)	1.08±0.19
	tPA-LPS	1.43±0.09
		BAL FDP（ng/mL）
Choi G 2007	control 1	272.1±54.36(11)
	tPA 4h	941±55.64(8)
	control 2	386.9±90.76(12)
	tPA 16h	744.3±55.72(8)
Choi G 2007*	control 1	642.95±77.5（8）
	tPA 6h	1346.14±58.18（8）
	control 2	406.78±39.89（8）
	tPA 16h	1137.37±58.24（8）
Hofstra JJ 2013	control 1	544.30±123.81（7）
	tPA- P. aeruginosa	1354.87±206.44（7）
	control 2	556.57±66.31（7）
	tPA-LPS	855.84±106.61（7）
Motoyama H 2013	control	54.38(ng)
	no-plasmin	374.62±79.93/3.7462±0.7993
	plasmin	830.82±255.78/8.3082±2.5578
Motoyama H 2013	no-plasmin	175.9±82.81/1.759±0.8281
	plasmin	805.9±536.8/8.509±5.368
		BAL PAA
Choi G 2007	control 1	78.32±5.57
	tPA 4h	120±1.23
	control 2	68.21±4.36
	tPA 16h	120±1.23
Choi G 2007*	control 1	67.43±6.46（8）
	tPA 6h	120±0.5
	control 2	73.71±4.85
	tPA 16h	120±0.5
Hofstra JJ 2013	control 1	47.33±11.73
	tPA- P. aeruginosa	119.12±0.5
	control 2	74.73±4.72
	tPA-LPS	120.10±0.5
		BAL PAI-1（ng/ml)
Choi G 2007	control 1	17.56±3.38(11)
	tPA 4h	098±0.5(8)
	control 2	22.20±4.33(12)
	tPA 16h	0.86±0.5(8)
Choi G 2007*	control 1	25.43±4.44（8）
	tPA 6h	1.1±0.5(8)
	control 2	23.71±3.23（8）
	tPA 16h	1.1±0.5（8）
Hofstra JJ 2013	control 1	26.70±1.93(7)
	tPA- P. aeruginosa	3.76±1.77(7)
	control 2	22.48±4.15(7)
	tPA-LPS	1.24±0.31(7)
		BAL TATc（ng/ml）
Choi G 2007	control 1	2.50±0.48(11)
	tPA 4h	2.68±0.56(8)
	control 2	3.55±0.45(12)
	tPA 16h	2.58±0.37(8)
Choi G 2007*	control 1	8.36±0.85（8)
	tPA 6h	8.1±1.21（8）
	control 2	4.16±0.73（8）
	tPA 16h	4.41±0.97（8）
Hofstra JJ 2013	control 1	4.60±0.81（7）
	tPA- P. aeruginosa	5.11±0.86（7）
	control 2	4.15±0.70（7）
	tPA-LPS	4.92±0.75（7）
		BAL AT
Choi G 2007	control 1	20.66±4.35(11)
	tPA 4h	20.98±5.10(8)
	control 2	7.05±2.84(12)
	tPA 16h	8.03±2.78(8)
Choi G 2007*	control 1	5.42±1.75（8）
	tPA 6h	6.5±3.50（8）
	control 2	8.20±1.75（8)
	tPA 16h	6.96±1.75（8）
Hofstra JJ 2013	control 1	5.42±1.75（8）
	tPA- P. aeruginosa	6.5±3.50（8）
	control 2	8.20±1.75（8)
	tPA-LPS	6.96±1.75（8）
		BAL Protein	（mg/ml)
Choi G 2007*	control 1	0.431±0.129
	tPA 6h	0.376±0.074
	control 2	0.638±0.060
	tPA 16h	0.646±0.105
Huang LT 2012	control	91.9±17.46（7）	(mg/kg)
	tPA	71.69±5.51（7）
Günther A 2003	control	1.304±0.72（9）
	uPA＋early (28days measure)	0.526±0.20（5）
	uPA＋late (28days measure)	0.532±0.24（7）
Hofstra JJ 2013	control 1	0.78±0.187（7）
	tPA- P. aeruginosa	0.97±0.278（7）
	control 2	0.69±0.269（7）
	tPA-LPS	1.04±0.299（7)
	cardiopulmonary function index
paper	MPAP	base	IAC	0h	0.5h	1h	1.5h	2h	2.5h	3h	3.5h	4h	4.5h	5h	5.5h	8	12	18	24	30	36	42	48
Hardaway RM1990	control			17.87								17.79				16.95	16.59	19.99	19	20.66	15	21.96	33.95
	uPA			14.1								14.17				13.74	13.94	13.71	12.93	14.94	19.11	15.33	17.76
	tPA			12.99								14.16				16.11	14.42	14.9	13.42	13.2	13.6	14.21	13.85
Vasquez Y 1998	control 1	21.28±3.94（7）	30.18±3.50（7）	30.32±3.94（7）	31.30±3.94（7）	33.44±3.50（7）	35.67±3.97（7）	32.60±3.94（7）	32.58±4.38（7）	31.91±4.37（7）	27.28±6.56（7）	27.75±5.68（7）	27.76±6.12（7）	26.75±5.69（7）	24.60±6.12（7）
	uPA1h	17.15±2.63（7）	26.87±3.06（7）	27.68±4.37（7）	28.82±3.94（7）	28.32±3.94（7）	29.67±4.08（7）	28.46±4.37（7）	30.43±3.50（7）	28.61±3.50（7）	32.23±6.56（7）	29.41±5.68（7）	29.57±6.12（7）	28.23±5.69（7）	24.59±6.12（7）
	control 2	15.56±5.08（6）	41.93±4.07（6）	32.46±4.57（6）	32.88±4.57（6）	31.44±4.57（6）	32.70±4.57（6）	33.13±4.06（6）	32.52±3.56（6）	32.53±4.07（6）	32.96±4.57（6）	32.56±3.56（6）	30.08±4.07（6）
	uPA2h	10.17±5.08（6）	41.93±6.10（6）	26.85±5.08（6）	28.94±5.08（6）	28.75±5.08（6）	27.93±4.57（6）	27.74±5.08（6）	26.50±5.08（6）	27.14±5.08（6）	18.85±5.59（6）	25.09±5.08（6）	23.44±4.57（6）
Münster AM 2002	control			16.75±3.18(n=14)															16.5±1.12(n=11)
	uPA			14.75±2.60(n=14)															16.75±3.19(n=8)
	Cardiac output	base	IAC	0h	0.5h	1h	1.5h	2.0h	2.5h	3h	3.5h	4h	4.5h	5h	5.5h	6h	16h	26h	36h	44h
Hardaway RM1990	control			4.68±0.42												2.88±0.26	1±0.09	1.72±0.15	3.96±0.36	4.96±0.45
	uPA			4.5±0.41												3.98±0.36	3.31±0.3	3±0.27	2.43±0.22	2.77±0.25
	tPA			3.27±0.29												2.85±0.27	2.81±0.25	3.04±0.27	3.19±0.29	2.77±0.25
Hardaway RM 1996	control	5.72±0.51		4.23±0.38		5.46±0.49	4.57±0.41	5.02±0.45	5.61±0.5	5.18±0.47	5.15±0.46	5.52±0.5	5.83±0.52	6.17±0.56
	UPA	5.89±0.53		4.8±0.43		5±0.45	4.3±0.39	4.7±0.42	5.12±0.46	4.06±0.37	3.93±0.35	4.03±0.36	4.24±0.38	4.16±0.37
Vasquez Y 1998	control 1	5.97±0.58	4.98±0.42	6.10±0.50	6.91±0.24	6.23±0.58	6.32±0.26	5.27±0.50	5.24±0.32	4.97±0.48	4.54±0.48	4.57±0.40	4.94±0.48	5.38±0.48	5.19±0.50	5.78±0.42
	uPA1h	7.86±0.63	6.03±0.66	7.68±0.66	6.69±0.58	6.51±0.48	6.08±0.56	5.95±0.58	5.36±0.58	5.80±0.50	5.50±0.40	5.62±0.50	4.97±0.50	6.49±0.50	5.41±0.58	6.93±0.48
	control 2	5.53±0.44	4.15±0.47	4.47±0.37	4.21±0.44	4.42±0.39	3.77±0.44	3.95±0.39	3.54±0.44	3.98±0.47	3.91±0.44	3.96±0.39	3.91±0.39	4.09±0.39
	uPA2h	6.1±0.39	4.77±0.32	6.08±0.39	5.93±0.37	5.49±0.37	5.20±0.32	5.13±0.37	5.26±0.37	5.75±0.39	5.37±0.37	5.26±0.39	4.38±0.37	4.74±0.39
	lung homogenates index
	lung myeloperoxidase(MPO) activity（u/g）
paper
Choi G 2007	control 2	13.98±1.32
	tPA 16h	14.13±0.97
Stringer KA 1998	control	11.2±5.8（10）
	tPA	11.1±3.2（6)
Choi G 2007*	control 1	20.48±2.06（8）
	tPA 6h	18.7±1.81（8）
	control 2	18.58±2.96（8）
	tPA 16h	25.13±4.38（8）
	lung TNF-α（pg/ml）		0h	24h	48h
Choi G 2007	control 1	751.6±292.66(11)
	tPA 4h	719±231.10(8)
	control 2	356.2±101.84(12)
	tPA 16h	709.2±480.83(8)
Choi G 2007*	control 1	2430±880
	tPA 6h	2230±470.
	control 2	235±230
	tPA 16h	458±240
Hofstra JJ 2013	control 1	1149.51±292.28
	tPA- P. aeruginosa	485.52±188.10
	control 2	302.43±41.66
	tPA-LPS	372.25±50.92
Renckens R 2008	control		31.79±28.09	93.38±73.06	204.64±134.86
	tPA		47.68±22.49	11.92±5.63	97.35±129.26
	lung IL-6（ng/ml）		0h	24h	48h
Choi G 2007	control 1	8.92±4.54(11)
	tPA 4h	6.7±3.14(8)
	control 2	0.9±0.28(12)
	tPA 16h	1±0.28(8)
Hofstra JJ 2013	control 1	1.25±0.32(7)
	tPA- P. aeruginosa	1.24±0.52(7)
	control 2	1.36±0.50(7)
	tPA-LPS	2.19±0.31(7)
Renckens R 2008	control		0.063±0.04(8)	0.13±0.11	0.27±0.24
	tPA		0.09±0.04(8)	0.01±0.007	0.09±0.13
Choi G 2007*	control 1	5.76±0.85(8)
	tPA 6h	4.57±0.49(8)
	control 2	1.31±0.40(8)
	tPA 16h	0.79±0.29(8)
	lung CINC-3（ng/ml）
Choi G 2007	control 1	42.89±9.32(11)
	tPA 4h	33.7±9.64(8)
	control 2	8.4±2.98(12)
	tPA 16h	7.98±2.72(8)
Choi G 2007*	control 1	1.73±0.57
	tPA 6h	2.49±0.66
	control 2	3.27±1.45
	tPA 16h	7.00±4.31
Hofstra JJ 2013	control 1	4.20±2.21
	tPA- P. aeruginosa	1.68±1.32
	control 2	1.02±0.24
	tPA-LPS	1.40±0.32
		Lung water content
Motoyma 2014	control	0.36±0.16	5.33±0.26
(weight gain)	plasmin	0.078±0.029	3.76±0.03
Motoyama 2013	control	0.23±0.22	5.72±0.28
(weight gain)	plasmin	0.099±0.13	3.6±0.08
Enkhbaatar 2004	control	6.9±0.16
(wet/dry ratio)	tPA	6±0.24
Chen 2006	control	5.99±0.48
(wet/dry ratio)	UK	5.77±0.45
Stringer 1998	control	0.10±0.03	9.63±3.17
(lung leak index)	tPA	0.05±0.005	4.75±0.79
	Lung injury score
Motoyma 2014	control		4±0.2
	plasmin		0.5±0.025
Motoyama 2013	control		4±0.2
	plasmin		0.5±0.025
Chen 2009	control		4±0.2
	UK		2±0.1
Chen 2006	control	5.59±0.76
	UK	4.43±0.64
Choi G 2007*	control 2	7.78±0.75
	tPA 16h	5.75±0.83
Hofstra JJ 2013	control 1		5.42±2.33
	tPA- P. aeruginosa		8.28±1.28
	control 2		4.25±1.71
	tPA-LPS		5.17±0.85
Huang 2012	control		10.25±2.04
	tAP		6±0.61
Renckens 2008	control		5.67±2.55
	tAP		5.31±2.76
	Mortality(end-point)
Vasquez Y 1998	control 1	6(6)
	uPA1h	5(6)
	control 2	4(7)
	uPA2h	0(7)
Hardaway 1964	control	31(34)
	treated	5(13)
Renckens 2008	control	9(12)
	tPA	4(12)
Sisson 2002	control	5(10)
	uPA	1(11)
Hardaway 1990	control	9(9)
	uPA	0(5)
	tPA	0(5)
Veress 2015	control	13(13)
	tPA	0(9)
Hardaway 1996	control	7(8)
	uPA	0(8)
Veress 2013a	control	4(4)
	tPA	0(12)

## Sheet: Sheet3
7.55	0.04
7.5	0.056
7.45	0.078
